# Supplementary material for: A molecular dynamics simulation study for variant drug responses due to FMS-like tyrosine kinase 3 G697R mutation
Source: Royal Society of Chemistry journal article supplement (doi:10.1039/c7ra04099g), 2017-01-01
Supplement: c7ra04099g1.pdf [file c7ra04099g1.pdf]

A Molecular Dynamics Simulation Study for Variant  
Drug Responses Due to FMS-Like Tyrosine Kinase 3  
G697R Mutation

Chien-Cheng Lee<sup>1</sup>

Yu-Chung Chuang<sup>2</sup>

Yu-Lin Liu<sup>2</sup>

Chia-Ning Yang<sup>†,2</sup>

<sup>1</sup> Department of Pharmacy, Zuoying Armed Forces General Hospital, Kaohsiung, Taiwan

<sup>2</sup> Department of Life Science, National University of Kaohsiung, Kaohsiung, Taiwan

†All correspondence should be addressed to: Chia-Ning Yang, PhD

Address: No. 700, Kaohsiung University Road, Nan-Tzu District 811, Kaohsiung, Taiwan

Tel: 886-7-5919717

Fax: 886-7-5919404

E-mail: [cnyang@nuk.edu.tw](mailto:cnyang@nuk.edu.tw)

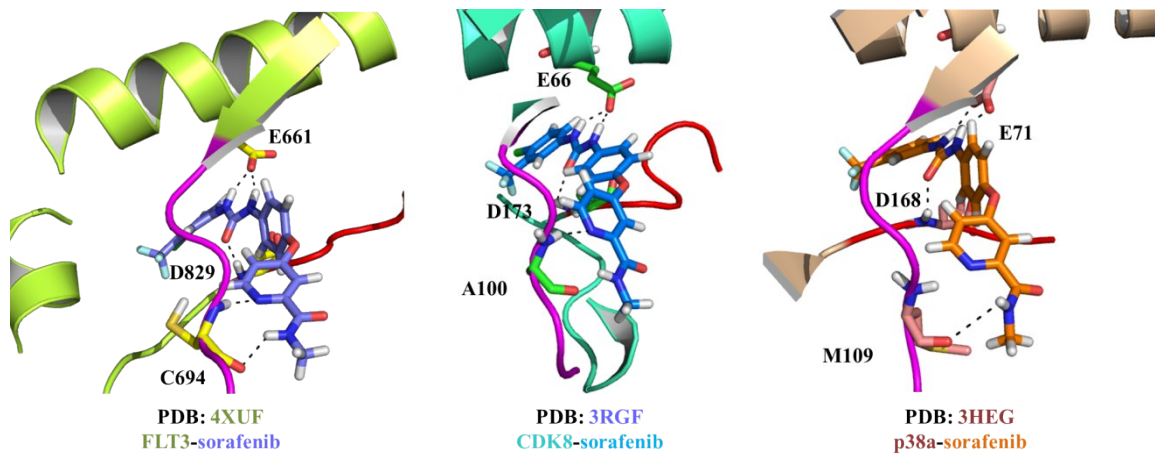

Fig. S1 A structural comparison is made among sorafenib-bound FLT3, CDK8, and p38 $\alpha$  kinases to support our modeled FLT3<sup>ITD</sup>:sorafenib complex.

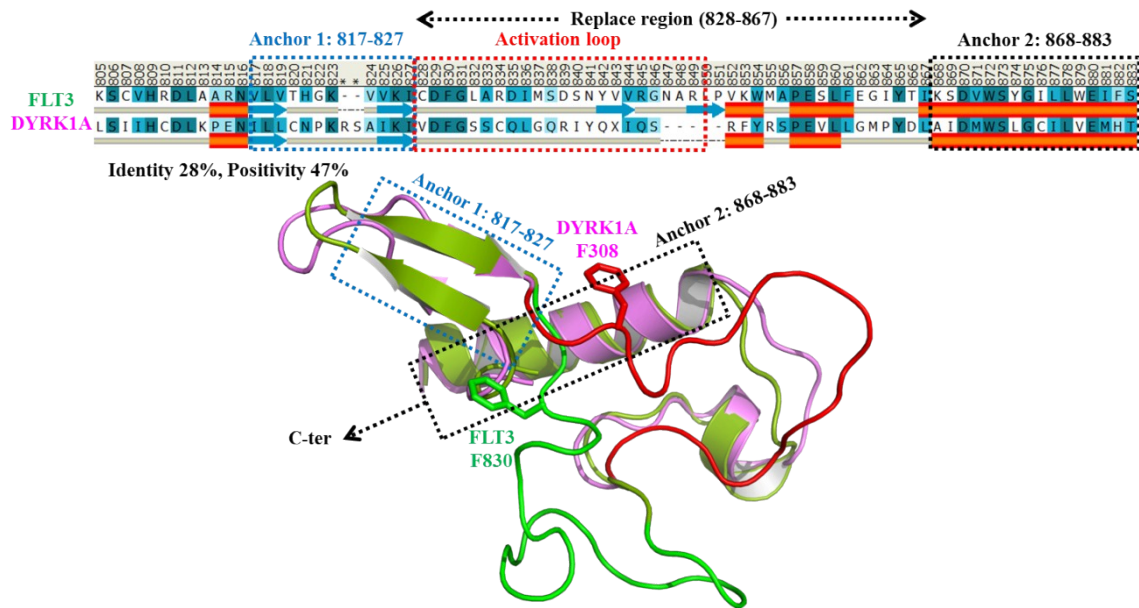

Fig. S2 A structural comparison is made between PKC412-bound FLT3 and PKC412-bound DYRK1A with parallel ligand-receptor interaction to support our modeled FLT3<sup>ITD</sup>:PKC412 complex structure.
